# Supplementary material for: Tracking microevolution events among ST11 carbapenemase-producing hypervirulent Klebsiella pneumoniae outbreak strains
Source: PubMed Central journal article supplement (PMC6087712; doi:10.1038/s41426-018-0146-6), 2018-08-12
Supplement: 41426_2018_146_MOESM1_ESM.pdf [file 41426_2018_146_MOESM1_ESM.pdf]

Supplementary materials

**Tracking microevolution events among ST11 carbapenemase-producing  
hypervirulent *Klebsiella pneumoniae* outbreak strains**

Ning Dong<sup>1,2</sup>, Xuemei Yang<sup>1,2</sup>, Rong Zhang<sup>3</sup>, Edward Wai-Chi Chan<sup>2</sup>, Sheng Chen<sup>1,2,\*</sup>

<sup>1</sup>Shenzhen Key lab for Food Biological Safety Control, Food Safety and Technology  
Research Center, Hong Kong PolyU Shen Zhen Research Institute, Shenzhen, P. R.  
China;

<sup>2</sup>State Key Lab of Chirosciences, Department of Applied Biology and Chemical  
Technology, The Hong Kong Polytechnic University, Hung Hom, Kowloon, Hong Kong;

<sup>3</sup>Second Affiliated Hospital of Zhejiang University, Hangzhou, China;

Corresponding authors: Sheng Chen, sheng.chen@polyu.edu.hk

**Keywords:** *Klebsiella pneumoniae*, ST11, carbapenem resistance, hypervirulence,  
evolution, genome sequence, Nanopore MinION sequencing

**Supplementary table 1. Genome statistics of the ST11 CR-hvKP *K. pneumoniae* strains.**

|                                                 | <i>K. pneumoniae</i> 5                   | <i>K. pneumoniae</i> 4                   | <i>K. pneumoniae</i> 1                   |
|-------------------------------------------------|------------------------------------------|------------------------------------------|------------------------------------------|
| Chromosome Size (bp)                            | 5,408,302                                | 5,388,721                                | 5,390,059                                |
| G+C content (%)                                 | 57.4                                     | 57.4                                     | 57.4                                     |
| Number of CDS                                   | 5207                                     | 5205                                     | 5197                                     |
| number of rRNA                                  | 25                                       | 24                                       | 24                                       |
| number of tRNA                                  | 76                                       | 82                                       | 73                                       |
| Prophages                                       | 9                                        | 9                                        | 8                                        |
| number of ICE                                   | 2                                        | 2                                        | 2                                        |
| number of IS                                    | 44                                       | 44                                       | 43                                       |
| IS <i>Plu15</i>                                 | 6                                        | 6                                        | 6                                        |
| IS <i>407</i>                                   | 2                                        | 2                                        | 2                                        |
| IS <i>903</i>                                   | 1                                        | 1                                        | 1                                        |
| IS <i>5</i>                                     | 14                                       | 15                                       | 12                                       |
| IS <i>3</i>                                     | 2                                        | 1                                        | 1                                        |
| IS <i>6</i>                                     | 2                                        | 2                                        | 3                                        |
| IS <i>1</i>                                     | 3                                        | 3                                        | 3                                        |
| IS <i>481</i>                                   | 4                                        | 4                                        | 3                                        |
| IS <i>150</i>                                   | 5                                        | 5                                        | 5                                        |
| IS <i>1182</i>                                  | 1                                        | 1                                        | 1                                        |
| IS <i>1380</i>                                  | 2                                        | 2                                        | 4                                        |
| IS <i>1111</i>                                  | 2                                        | 2                                        | 2                                        |
| chromosome-borne antimicrobial resistance genes | <i>aadA2, sull, bla<sub>SHV-11</sub></i> | <i>aadA2, sull, bla<sub>SHV-11</sub></i> | <i>aadA2, sull, bla<sub>SHV-11</sub></i> |
| number of plasmids                              | 5                                        | 5                                        | 5                                        |

ICE, integrative and conjugative elements; IS, insertion sequence.

**Supplementary table 2. Information of plasmids in the ST11 CR-hvKP isolates.**

|               | Length (bp)  |              |              | G+C (%)      |              |              | Number of CDS identified with |              |              |
|---------------|--------------|--------------|--------------|--------------|--------------|--------------|-------------------------------|--------------|--------------|
|               |              |              |              |              |              |              | RAST                          |              |              |
|               | CR-<br>HvKP5 | CR-<br>HvKP4 | CR-<br>HvKP1 | CR-<br>HvKP5 | CR-<br>HvKP4 | CR-<br>HvKP1 | CR-<br>HvKP5                  | CR-<br>HvKP4 | CR-<br>HvKP1 |
| pVir-CR-HvKP* | 177,694      | 178,154      | 177,790      | 50.5         | 50.5         | 50.5         | 180                           | 179          | 180          |
| pKPC-CR-HvKP* | 177,587      | 177,585      | 177,591      | 53.1         | 53.1         | 53.1         | 219                           | 218          | 216          |
| p3-CR-HvKP*   | 99,717       | 99,722       | 99,717       | 49.8         | 49.8         | 49.8         | 104                           | 105          | 107          |
| p4-CR-HvKP*   | 11,970       | 11,970       | 11,970       | 55.6         | 55.6         | 55.6         | 13                            | 13           | 13           |
| p5-CR-HvKP*   | 5,596        | 5,596        | 5,596        | 51.1         | 51.1         | 51.1         | 9                             | 9            | 9            |

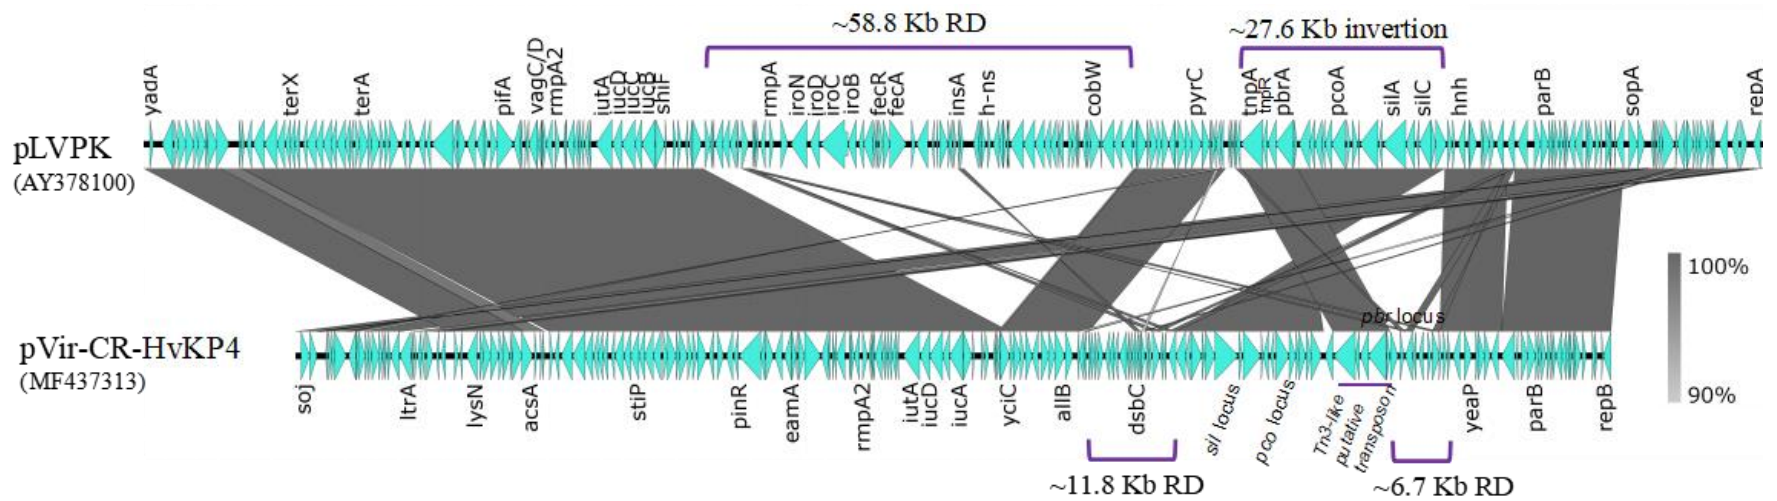

**Supplementary figure S1.** Comparison between virulence plasmids pVir-CR-HvKP4 (GenBank accession: MF437313) and pLVPK (GenBank accession: AY378100) in *K. pneumoniae*. Green arrows indicate the predicted genes in the plasmids. Regions of divergences (RD) were labeled with blue square brackets.

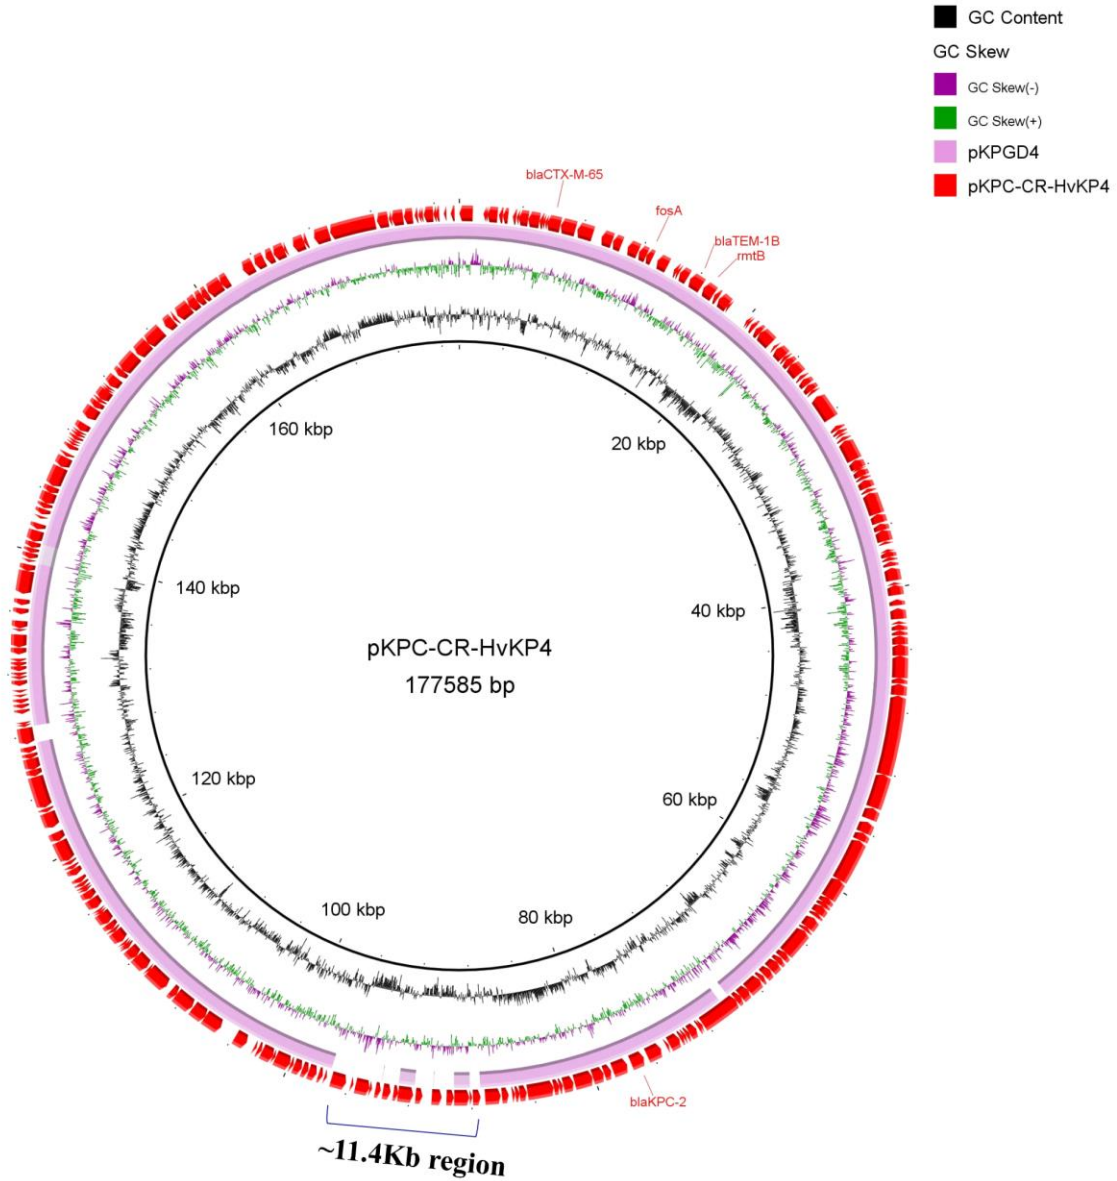

**Supplementary Figure S2. Alignment of *bla*<sub>KPC-2</sub> bearing plasmids pKPC-CR-HvKP4 (GenBank accession: MF437312) and pKPGD4 (CP025952) in *K. pneumoniae*. The plasmid sequence of pKPC-CR-HvKP4 was used as the reference (outermost circle). Antimicrobial resistance genes and the 11.4 Kb region of divergence were labelled in the figure.**
